# Supplementary material for: Design of nanofiber-based electrodes for solid oxide electrochemical cells with high performance and stability
Source: Royal Society of Chemistry journal article supplement (doi:10.1039/d4ta05916f), 2024-12-02
Supplement: d4ta05916f1.pdf [file d4ta05916f1.pdf]

## Supporting Information

### **Design of nanofiber-based electrodes for solid oxide electrochemical cells with high performance and stability**

Seungwoo Han<sup>1</sup>, Hyun Sik Yoo<sup>1</sup>, Wonyoung Lee<sup>1,2\*</sup>

<sup>1</sup> School of Mechanical Engineering, Sungkyunkwan University, Suwon, Gyeonggi-do 16419, Republic of  
Korea

<sup>2</sup> SKKU Institute of Energy Science and Technology (SIEST), Sungkyunkwan University, Suwon, Gyeonggi-do  
16419, Republic of Korea

\* Corresponding author: [leewy@skku.edu](mailto:leewy@skku.edu) (Wonyoung Lee)

The structural characteristics of the LSC nanofibers at different sintering temperatures were compared. Figures S1(a) and S1(b) show the SEM images of the LSC nanofibers at different sintering temperatures, exhibiting a porous and hollow shape for LSC nanofibers sintered at 800 °C compared to a solid shape for those sintered at 900 °C. Figures S1(c) and S-d) show BET curves of the LSC powders and nanofibers with different sintering temperatures, exhibiting the specific surface areas of 2.34, 9.71, and 4.88 m<sup>2</sup> g<sup>-1</sup> for the LSC powders sintered at 900 °C, and LSC nanofibers sintered at 800 and 900 °C.

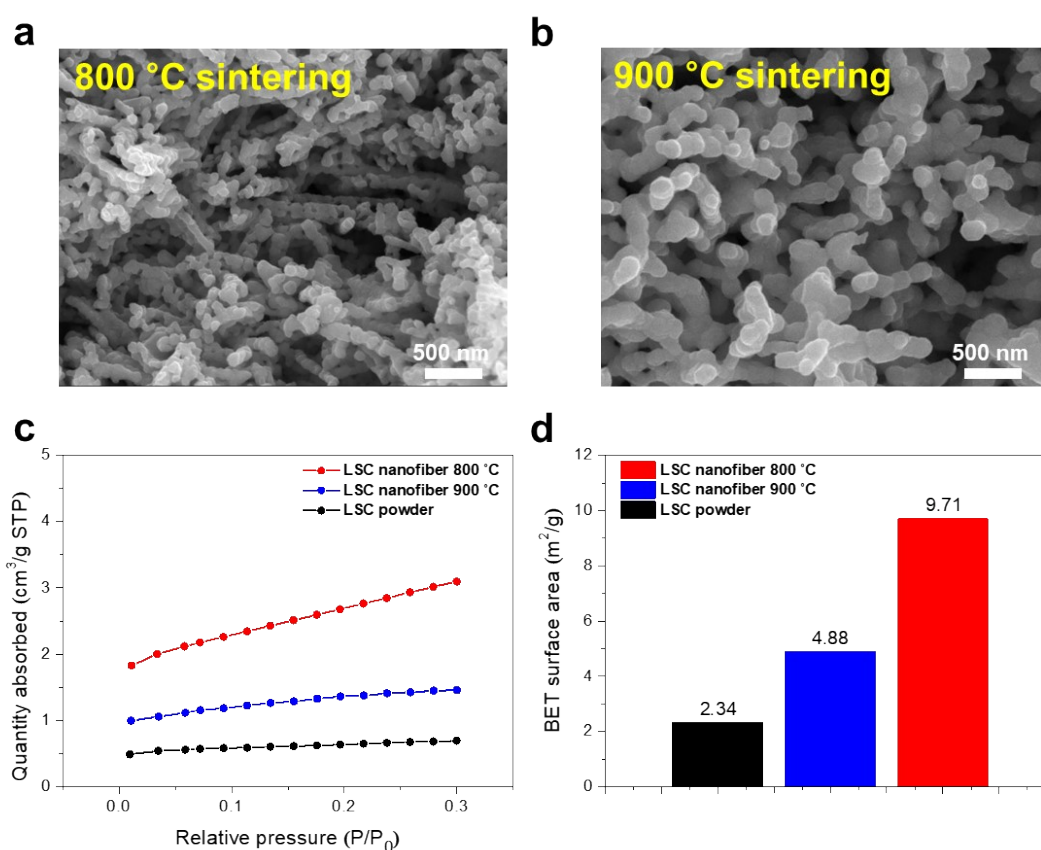

**Figure S1.** SEM images of the LSC nanofibers after sintering at (a) 800 °C and (b) 900 °C. BET curves of the (c) LSC powder after sintering at 900 °C, and LSC nanofibers (a) after sintering at 800 and 900 °C. (d) Specific surface areas based on the BET analysis.

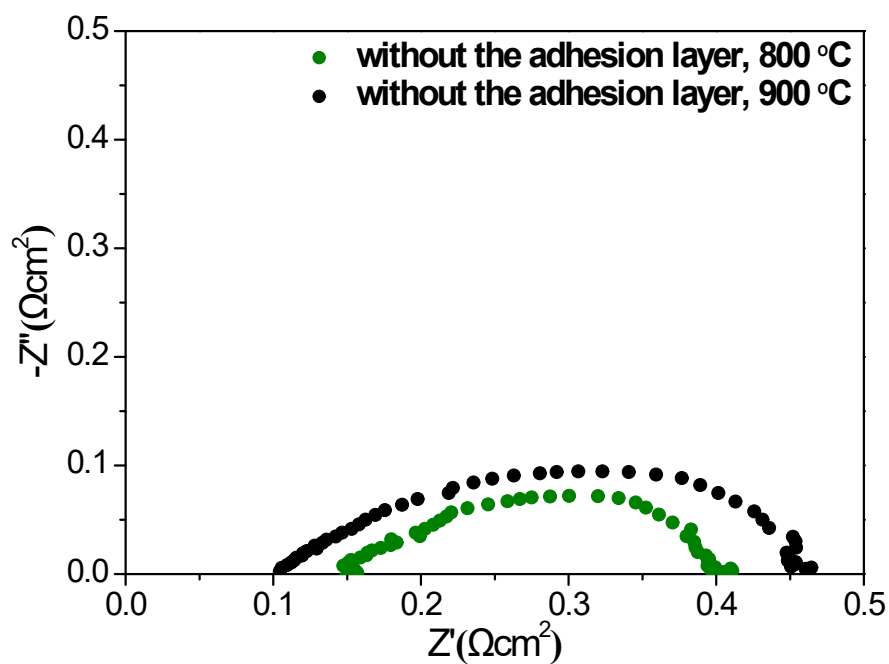

Figure S2. Nyquist plots of the nanofiber cells sintered at 800 and 900 °C without the adhesion layer.

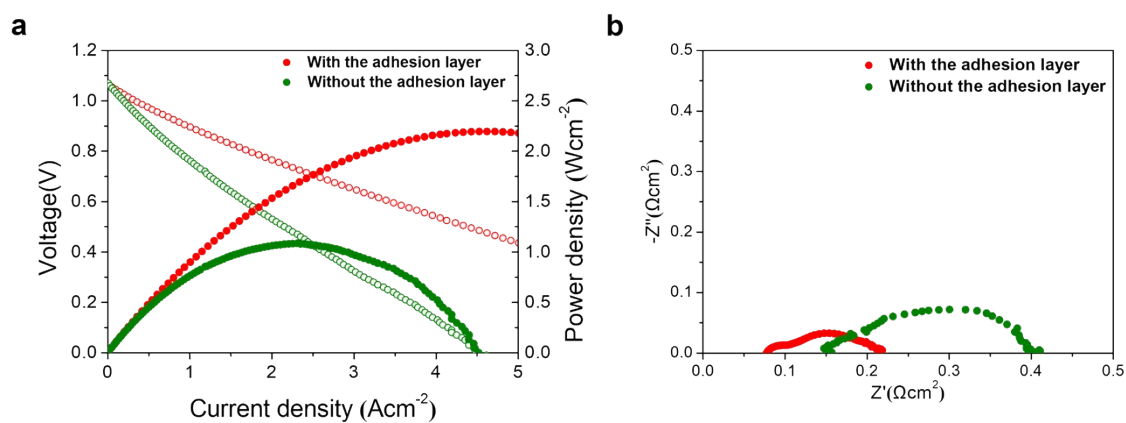

Figure S3. Electrochemical performance of the LSC nanofiber cells with and without LSC powder adhesion layer at 700 °C (a) I-V-P curves in FC mode, (b) Nyquist plots

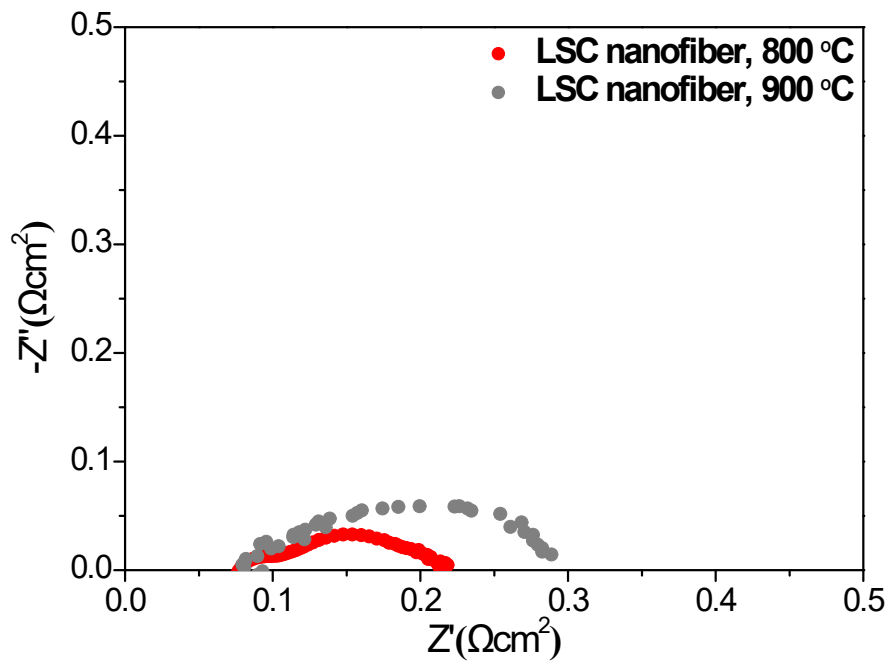

Figure S4. Nyquist plots of the nanofiber cells with the adhesion layer sintered at 800 and 900 °C.

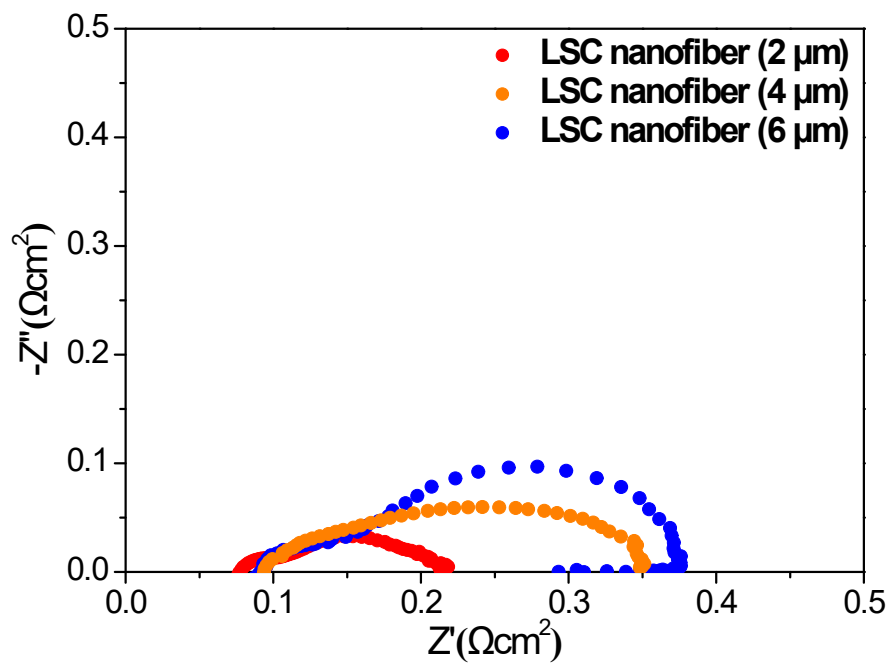

Figure S5. Nyquist plots of the nanofiber cells with the adhesion layer thickness of 2, 4, and 6 μm.

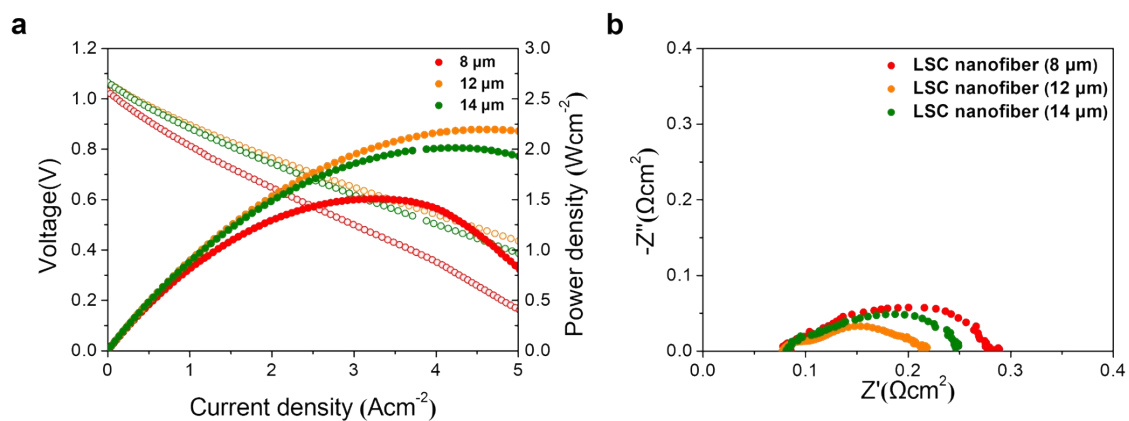

Figure S6. Electrochemical performance of the LSC nanofiber cells with different nanofiber thicknesses at 700 °C. (a) I-V-P curves in FC mode (b) Nyquist plot

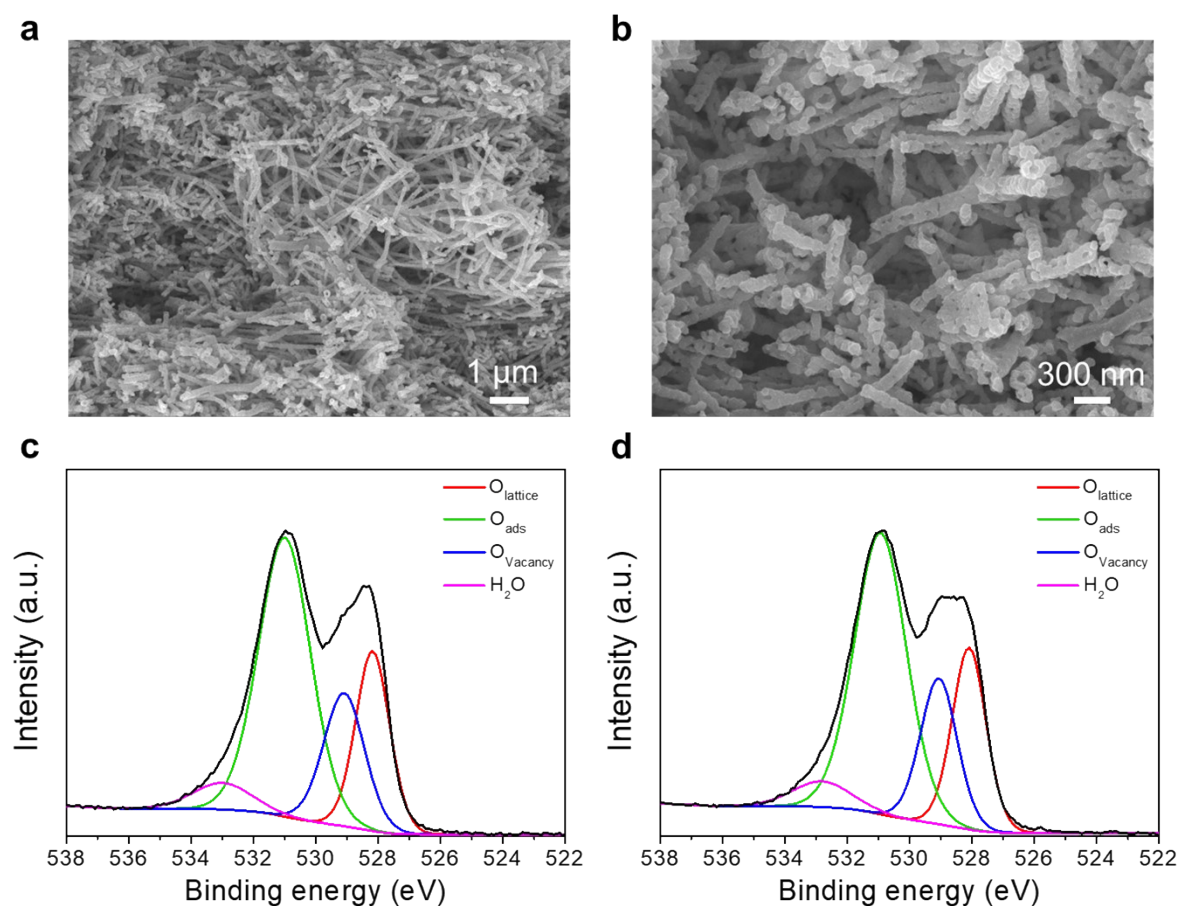

Figure S7. (a, b) SEM images of the LSC nanofiber cell after a 300-h stability test. XPS O 1s spectra of the LSC nanofiber cell (c) before and (d) after the stability test.

We calculated the relative intensity ratios of  $O_{\text{vacancy}}/O_{\text{lattice}}$  as a quantitative index to compare the concentration of oxygen vacancies. Before the stability test, the LSC nanofibers exhibited an intensity ratio of 0.896, which is lower than 0.871 after the stability test, confirming the maintained stability of the concentration of oxygen vacancies in LSC nanofibers after the stability test.

Table S1. Reaction order value and definition of the corresponding reaction.

|           | Reaction order (n) | Specific reaction                                               |
|-----------|--------------------|-----------------------------------------------------------------|
| <b>P5</b> | 0.84               | $O_{2(g)} \leftrightarrow O_{2,ad}$                             |
| <b>P4</b> | 0.39               | $O_{2,ad} \leftrightarrow 2O_{ad}$                              |
| <b>P3</b> | 0.2                | $O_{ad} + 2e^- + V_o^{\cdot\cdot} \leftrightarrow O_o^{\times}$ |
| <b>P2</b> | 0.04               | $H_2 + O^{2-} \leftrightarrow H_2O + 2e^-$                      |
| <b>P1</b> | 0.12               | $O_{TPB}^{2-} + V_o^{\cdot\cdot} \leftrightarrow O_o^{\times}$  |

The reaction order was calculated using the following equation:

$$R_p \propto 1/p(O_2)^n$$

In the high-frequency region, P1 is  $> 10^4$  Hz at 700 °C and n is measured to be 0.12, which is close to 0.1, indicating that P1 is mostly associated with the oxygen ion transfer from the electrode/electrolyte to the electrolyte/electrode. In the intermediate-frequency region, including the P2–P4 peaks, P2 represents  $10^3$ – $10^4$  Hz at 700 °C, and n is measured to be 0.04, which is close to 0, indicating that P2 is not affected by the oxygen partial pressure; thus, P2 is mostly associated with the hydrogen oxidation reaction and evolution reaction. P3 of  $10^2$ – $10^3$  Hz at 700 °C with the slope n of 0.20, which is close to 0.25, is mostly associated with the oxygen charge-transfer reaction of ORR and OER. P4 of  $10$ – $10^2$  Hz at 700 °C and slope n measured to be 0.39, which is close to 0.5, is mostly associated with oxygen dissociation and association. In the low-frequency region, P5 of  $< 10^0$  Hz at 700 °C and n measured to be 0.84, which is close to 1, is mostly associated with gas-diffusion and oxygen adsorption and desorption. Similar peaks have also been established in previous studies.<sup>1,2</sup>

Table S2. Resistances and their proportion in the LSC powder cell associated with five frequencies to the total resistance at 550–700 °C in FC mode.

| Temperature (°C) | Unit : $\Omega\text{cm}^2$ |         |         |         |
|------------------|----------------------------|---------|---------|---------|
|                  | 700                        | 650     | 600     | 550     |
| <b>P5</b>        | 0.013                      | 0.016   | 0.028   | 0.039   |
|                  | (8.8%)                     | (6.8%)  | (6.7%)  | (4.3%)  |
| <b>P4</b>        | 0.020                      | 0.027   | 0.047   | 0.057   |
|                  | (13.5%)                    | (11.4%) | (11.3%) | (6.3%)  |
| <b>P3</b>        | 0.066                      | 0.111   | 0.188   | 0.424   |
|                  | (44.6%)                    | (46.8%) | (45.2%) | (46.8%) |
| <b>P2</b>        | 0.015                      | 0.039   | 0.097   | 0.322   |
|                  | (10.1%)                    | (16.5%) | (23.3%) | (35.5%) |
| <b>P1</b>        | 0.034                      | 0.044   | 0.056   | 0.064   |
|                  | (23.0%)                    | (18.6%) | (13.5%) | (7.1%)  |

Table S3. Resistances and their proportion of the LSC nanofiber cell associated with five frequencies to the total resistance measured at 550–700 °C under FC mode.

| Temperature (°C) | Unit : $\Omega\text{cm}^2$ |         |         |         |
|------------------|----------------------------|---------|---------|---------|
|                  | 700                        | 650     | 600     | 550     |
| <b>P5</b>        | 0.013                      | 0.018   | 0.023   | 0.033   |
|                  | (9.5%)                     | (10.4%) | (8.5%)  | (5.9%)  |
| <b>P4</b>        | 0.018                      | 0.019   | 0.028   | 0.031   |
|                  | (13.1%)                    | (11.0%) | (10.3%) | (5.6%)  |
| <b>P3</b>        | 0.064                      | 0.068   | 0.079   | 0.136   |
|                  | (46.7%)                    | (39.3%) | (29.2%) | (24.4%) |
| <b>P2</b>        | 0.015                      | 0.030   | 0.092   | 0.307   |
|                  | (10.9%)                    | (17.3%) | (33.9%) | (55.0%) |
| <b>P1</b>        | 0.027                      | 0.038   | 0.049   | 0.051   |
|                  | (19.7%)                    | (22.0%) | (18.1%) | (9.1%)  |

Table S4. Activation energies of the LSC nanofiber and powder cells associated with the five frequencies to the total resistance measured at 550–700 °C under FC mode.

| <b>Unit: eV</b> |               |            |
|-----------------|---------------|------------|
|                 | LSC nanofiber | LSC powder |
| <b>P5</b>       | 0.42          | 0.52       |
| <b>P4</b>       | 0.29          | 0.51       |
| <b>P3</b>       | 0.34          | 0.84       |
| <b>P2</b>       | 1.41          | 1.40       |
| <b>P1</b>       | 0.29          | 0.30       |

Table S5. Resistances and their proportion in the LSC powder cell associated with the five frequencies to the total resistance measured at 550–700 °C under EC mode.

| Temperature (°C) | Unit: $\Omega\text{cm}^2$ |         |         |         |
|------------------|---------------------------|---------|---------|---------|
|                  | 700                       | 650     | 600     | 550     |
| <b>P5</b>        | 0.004                     | 0.011   | 0.015   | 0.018   |
|                  | (5.6%)                    | (8.5%)  | (4.7%)  | (2.2%)  |
| <b>P4</b>        | 0.005                     | 0.016   | 0.038   | 0.153   |
|                  | (6.9%)                    | (12.4%) | (12.0%) | (18.6%) |
| <b>P3</b>        | 0.004                     | 0.020   | 0.124   | 0.487   |
|                  | (5.6%)                    | (15.5%) | (39.1%) | (59.2%) |
| <b>P2</b>        | 0.024                     | 0.025   | 0.081   | 0.100   |
|                  | (33.3%)                   | (19.4%) | (25.6%) | (12.2%) |
| <b>P1</b>        | 0.035                     | 0.057   | 0.059   | 0.064   |
|                  | (48.6%)                   | (44.2%) | (18.6%) | (7.8%)  |

Table S6. Resistances and their proportion in the LSC nanofiber cell associated with five frequencies to the total resistance measured at 550–700 °C under EC mode.

| Temperature (°C) | Unit: $\Omega\text{cm}^2$ |         |         |         |
|------------------|---------------------------|---------|---------|---------|
|                  | 700                       | 650     | 600     | 550     |
| <b>P5</b>        | 0.003                     | 0.006   | 0.009   | 0.011   |
|                  | (5.4%)                    | (6.4%)  | (4.6%)  | (2.4%)  |
| <b>P4</b>        | 0.005                     | 0.013   | 0.029   | 0.110   |
|                  | (8.9%)                    | (13.8%) | (14.8%) | (23.8%) |
| <b>P3</b>        | 0.005                     | 0.016   | 0.046   | 0.211   |
|                  | (8.9%)                    | (17.0%) | (23.5%) | (45.6%) |
| <b>P2</b>        | 0.024                     | 0.040   | 0.089   | 0.098   |
|                  | (42.9%)                   | (42.6%) | (45.4%) | (21.2%) |
| <b>P1</b>        | 0.019                     | 0.019   | 0.023   | 0.033   |
|                  | (33.9%)                   | (20.2%) | (11.7%) | (7.1%)  |

Table S7. Activation energies of the LSC nanofiber and powder cells associated with the five frequencies to the total resistance measured at 550–700 °C under EC mode.

| <b>Unit: eV</b> |               |            |
|-----------------|---------------|------------|
|                 | LSC nanofiber | LSC powder |
| <b>P5</b>       | 0.60          | 0.67       |
| <b>P4</b>       | 1.36          | 1.51       |
| <b>P3</b>       | 1.74          | 2.19       |
| <b>P2</b>       | 0.69          | 0.76       |
| <b>P1</b>       | 0.26          | 0.25       |

## References

1. J. Lee, S. Hwang, M. Ahn, M. Choi, S. Han, D. Byun and W. Lee, *J. Mater. Chem. A*, 2019, **7**, 21120-21127.
2. S. U. Rehman, M. H. Hassan, H.-S. Kim, R.-H. Song, T.-H. Lim, J.-E. Hong, D.-W. Joh, S.-J. Park, J.-W. Lee and S.-B. Lee, *Appl. Catal. B-Environ.*, 2023, **333**, 122784.
